# Supplementary material
Source: PubMed Central journal article supplement (PMC5270507)
Supplement: NIHMS841652-supplement-Supplementary_Data.pdf [file NIHMS841652-supplement-Supplementary_Data.pdf]

# Supplementary Fig S1

Distribution of relative expression (upper panel) of PTHRP, PVA and TACSTD1 in histologically positive and negative lymph nodes as determined by review of all tissue sections (consensus pathology). The Y-axis shows relative expression as delta CT and the horizontal line indicates the most accurate cut-off determined from ROC curve analysis (lower panel).

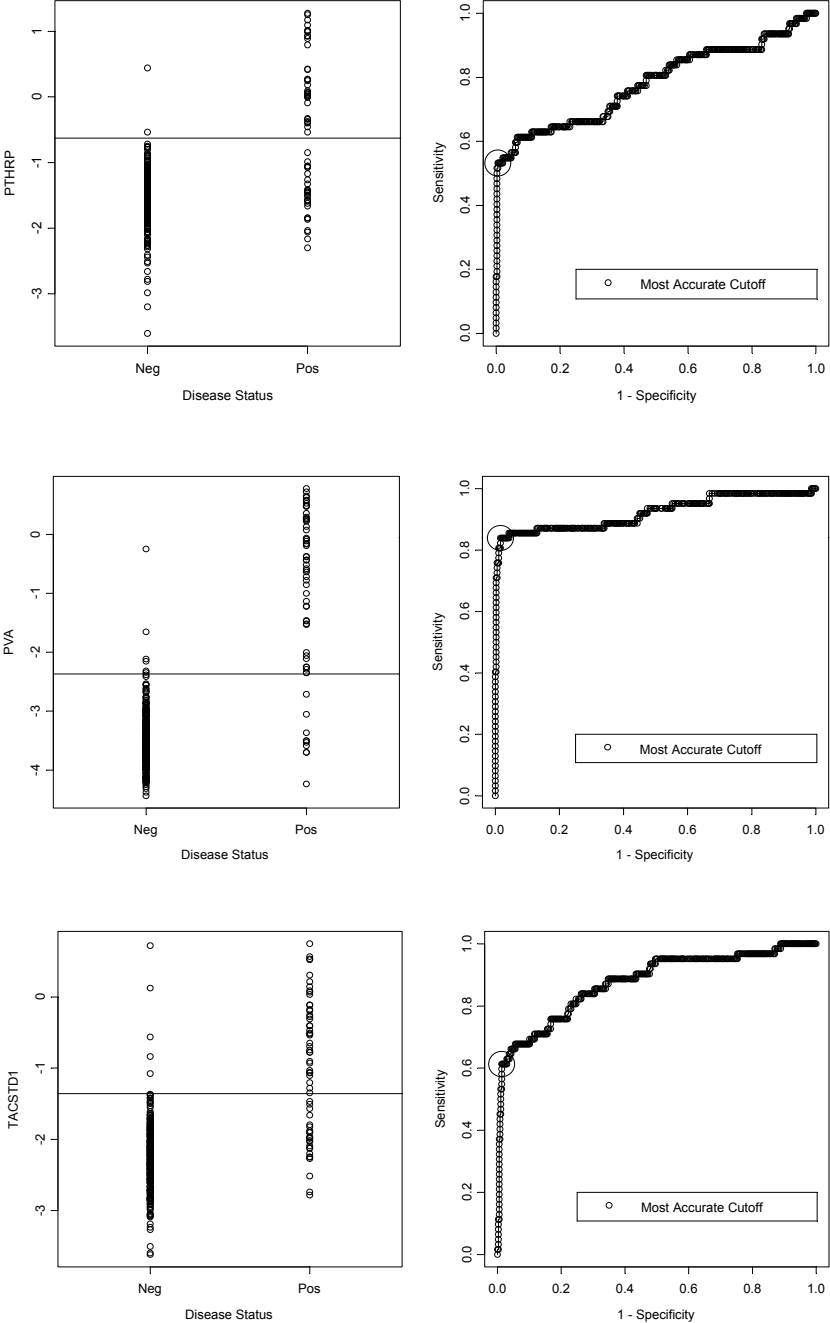

# Supplementary Figure S2

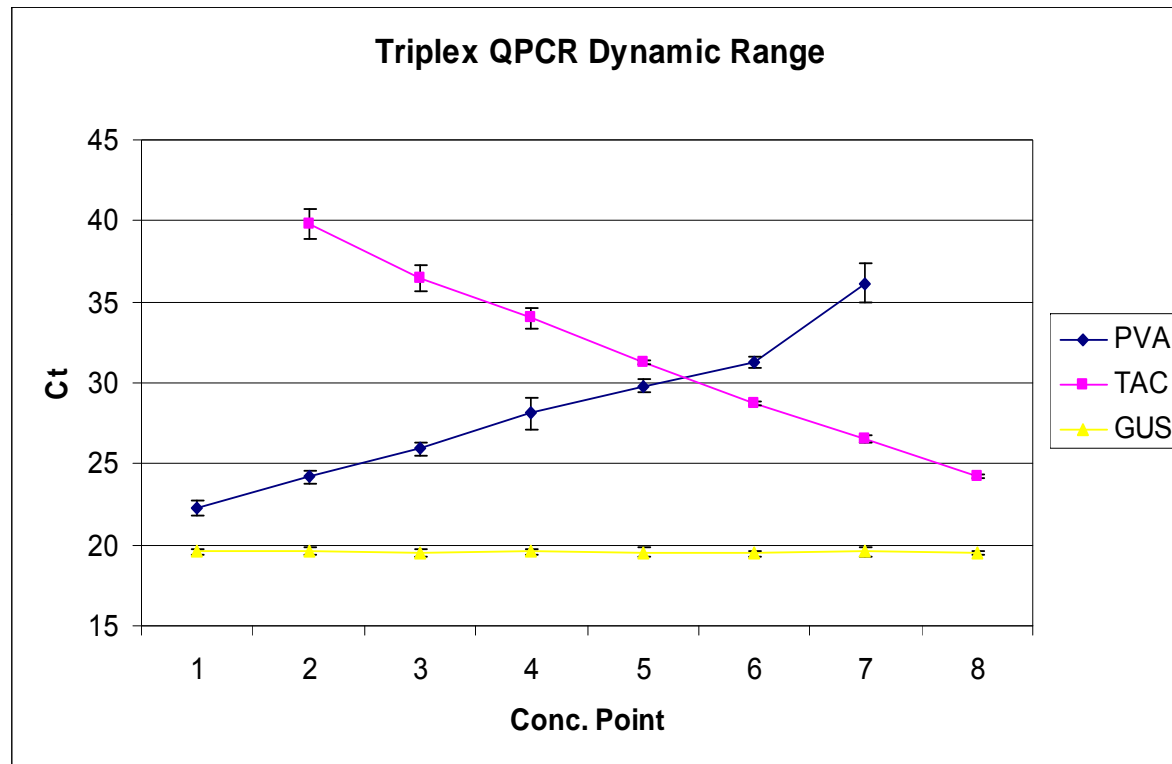

Dynamic range of markers PVA and TACSTD1 in the triplex assay.

# Supplementary Figure S3

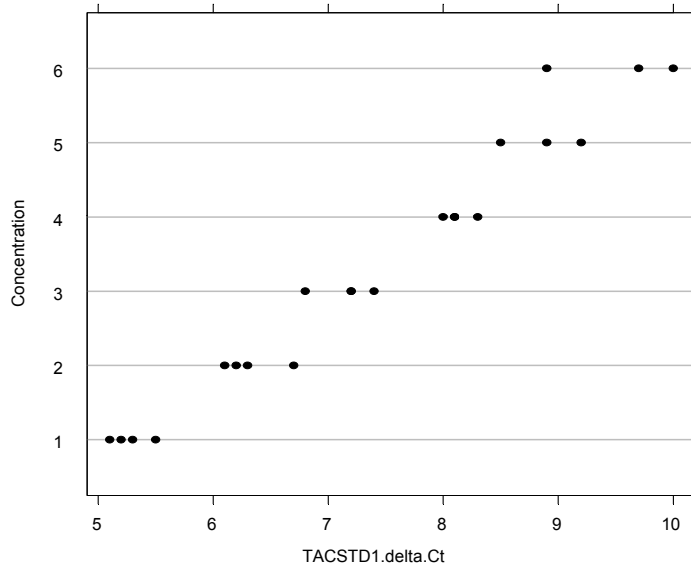

Coefficient of Variation = 3.9%  
Intraclass Correlation Coefficient = .968  
Lower 95% Confidence Bound for ICC = .914  
Standard Error of Measurement = .297  
95% Prediction Interval for a New Measurement = .58 cycles

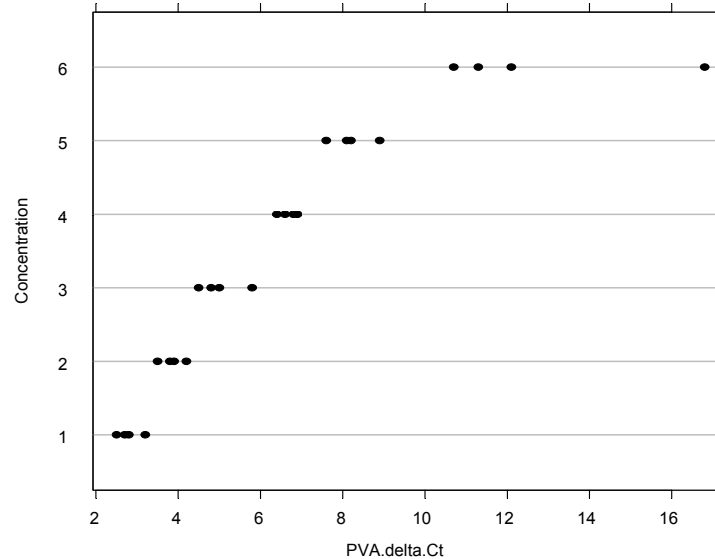

Coefficient of Variation = 18.2%  
Intraclass Correlation Coefficient = .898  
Lower 95% Confidence Bound for ICC = .751  
Standard Error of Measurement = 1.19  
95% Prediction Interval for a New Measurement = 2.34 cycles

## Supplementary Table S1. Oligonucleotide primer and probe sequences used in GeneXpert assay

| Gene    | Oligonucleotide | Sequence (5' → 3')                         |
|---------|-----------------|--------------------------------------------|
| GUSB    | RT primer       | TTTGGT TGTCTCTGCCGAGT                      |
|         | Forward primer  | CTCATTGGGAATTTTGCCGATTCA                   |
|         | Reverse primer  | CCGAGTGAAGATCCCCTT                         |
|         | Probe           | TGACTGAACAGTCACCGACGAGAGTGCTGG             |
| PVA     | RT primer       | ACAGGTCAACAGCAG                            |
|         | Forward primer  | * <b>GC</b> CTGTGGA ACTTCTTACCCAACCA       |
|         | Reverse primer  | * <b>CA</b> AGGGGGGCCAACAGCA               |
|         | Probe           | TGGCAGGCCGCACTCAGGGAGGC                    |
| TACSTD1 | RT primer       | AGTTTACGGCCAGCTTG                          |
|         | Forward primer  | * <b>GAC</b> GCGTTCGGGCTTCTGCTT            |
|         | Reverse primer  | * <b>GCGA</b> AGTTTTTCACAGACACATTCTTCCTGAG |
|         | Probe           | CGGCGACGGCGACTTTTGC                        |

\* Bases indicated in bold are non-complementary tails added to increase primer T<sub>m</sub> in later PCR cycles.

**Supplementary Table S2.** Summary table comparing clinical frozen section, research pathology and permanent pathology with overall consensus pathology as the gold standard. Details of each comparison are in Supplemental Tables B-D.

|                                | <b>Sensitivity</b> | <b>Specificity*</b> | <b>Accuracy</b> |
|--------------------------------|--------------------|---------------------|-----------------|
| <b>Clinical Frozen Section</b> | 80.3%              | 100%                | 97.2%           |
| <b>Research Pathology</b>      | 86.9%              | 100%                | 98.2%           |
| <b>Permanent Pathology</b>     | 91.8%              | 100%                | 98.9%           |

\* Specificity has to be 100% since overall pathology is a consensus of all three analyses.

## Supplementary Table S3. Research Pathology Final Call (H&E plus IHC): VS Overall Pathology

|         |     | Research |     |     |                                      |
|---------|-----|----------|-----|-----|--------------------------------------|
|         |     | Pos      | Neg | ITC |                                      |
| Overall | Pos | 53       | 8   | 1   | Overall Accuracy<br>433/442 = 98%    |
|         | Neg | 0        | 378 | 0   | Overall Accuracy*<br>431/439 = 98.2% |
|         | ITC | 0        | 0   | 2   | Sensitivity*<br>53/61 = 86.9%        |
|         |     |          |     |     | Specificity*<br>100%                 |

\* Not including ITC)

448 nodes evaluated (6 with PTC removed). No non-diagnostic cases. N=442

# Supplementary Table S4. Clinical FS Pathology VS Overall Pathology

|         |       | Clinical FS |     |     |
|---------|-------|-------------|-----|-----|
|         |       | Pos         | Neg | ITC |
| Overall | Pos   | 49          | 12  | 0   |
|         | Neg   | 0           | 374 | 0   |
|         | ITC   | 0           | 2   | 0   |
|         | Total | 49          | 386 | 0   |

Overall Accuracy  
423/437 = 96.8%

Overall Accuracy\*  
423/435 = 97.2%

Sensitivity\*  
49/61 = 80.3%

Specificity\*  
100%

\* Not including ITC)

448 nodes evaluated (6 with PTC removed). 5 non-diagnostic on FS. N=437

## Supplementary Table S5. Clinical Permanent Pathology VS Overall Pathology

|         |     | Clinical Permanent |     |     |                                      |
|---------|-----|--------------------|-----|-----|--------------------------------------|
|         |     | Pos                | Neg | ITC |                                      |
| Overall | Pos | 56                 | 5   | 2   | Overall Accuracy<br>432/439 = 98.4%  |
|         | Neg | 0                  | 376 | 0   | Overall Accuracy*<br>432/437 = 98.9% |
|         | ITC | 0                  | 0   | 0   | Sensitivity*<br>56/61 = 91.8%        |
|         |     |                    |     |     | Specificity*<br>100%                 |

\* Not including ITC)

448 nodes evaluated (6 with PTC removed). 3 non-diagnostic on perm. N=439
